# Supplementary material
Source: Springer Nature journal article supplement (https://www.springermedizin.de/resource/supplementary/13058_2012_3150_MOESM10_ESM.pdf/9703386)
Supplement: MOESM10 [file 9703386]

MDA-MB-231-GFP  
orthotopic tumor

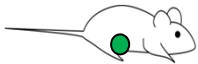

*in vivo* invasion  
assay =  
≤ 500 cells per  
mouse in 4  
hours collection

**migratory  
tumor cell  
subpopulation**

extract RNA  
amplify

$n=4$

Microarray Analysis

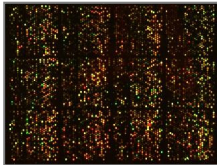

FACS of  
total GFP+  
tumor cells

**average  
primary tumor  
cell population**

extract RNA  
amplify

$n=4$
